# Supplementary material for: The effect of ionic Co presence on the structural, optical and photocatalytic properties of modified cobalt–titanate nanotubes
Source: Royal Society of Chemistry journal article supplement (doi:10.1039/c6cp01889k), 2016-01-01
Supplement: c6cp01889k4.pdf [file c6cp01889k4.pdf]

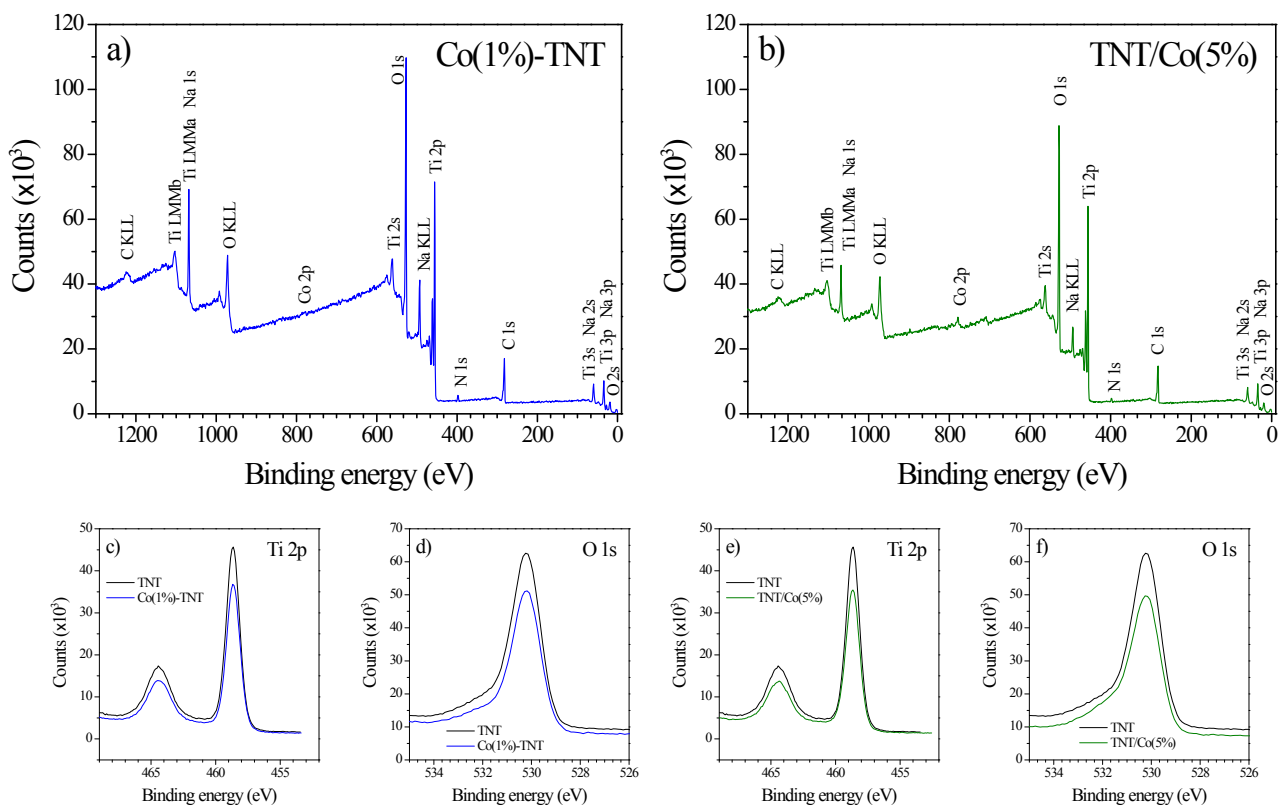

**Fig. S4** - XPS survey spectra of the Co(1%)-TNT (a) and TNT/Co(5%) (b) samples. XPS high resolution spectra of the Ti 2p (c,e), O 1s (d,f) regions.
