# Supplementary figures and images for: The effect of ionic Co presence on the structural, optical and photocatalytic properties of modified cobalt–titanate nanotubes
Source: Royal Society of Chemistry journal article supplement (doi:10.1039/c6cp01889k), 2016-01-01

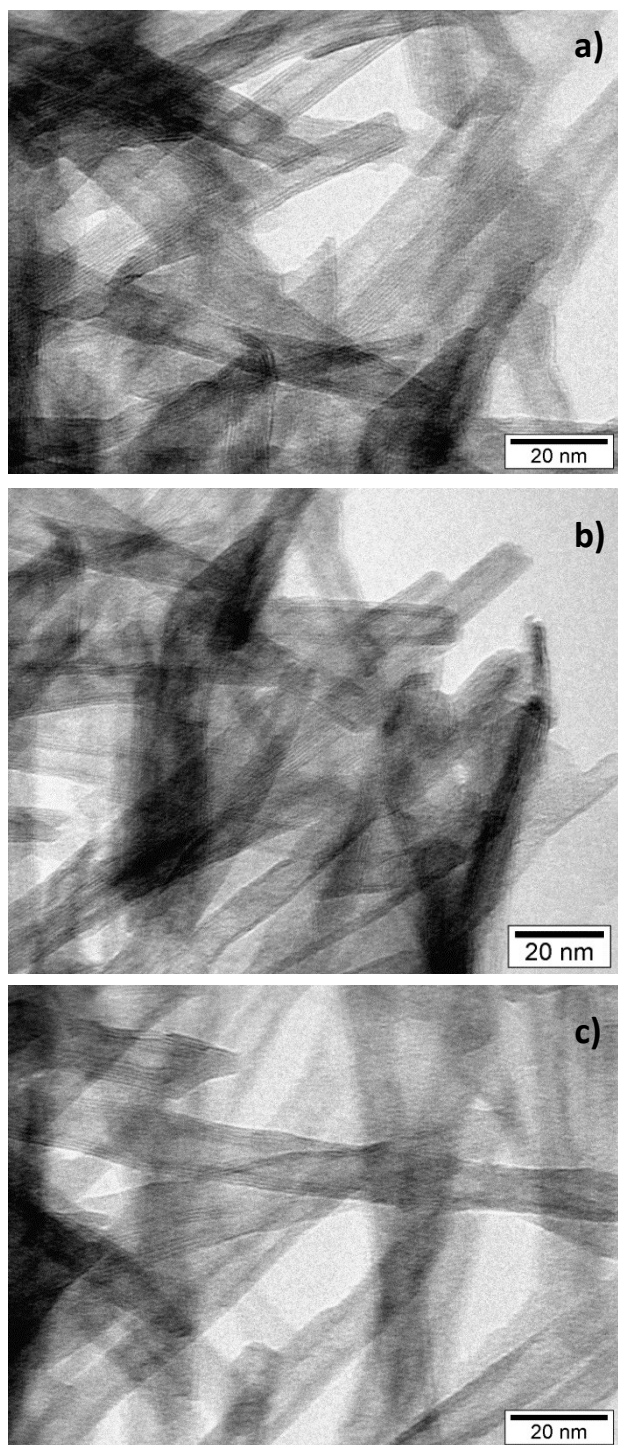

**Fig. S1** – HRTEM images of the Co(5%)-TNT (a), Co(1%)-TNT (b) and TNT/Co(5%) (c) modified samples.

Supplement: c6cp01889k1.pdf [file c6cp01889k1.pdf]

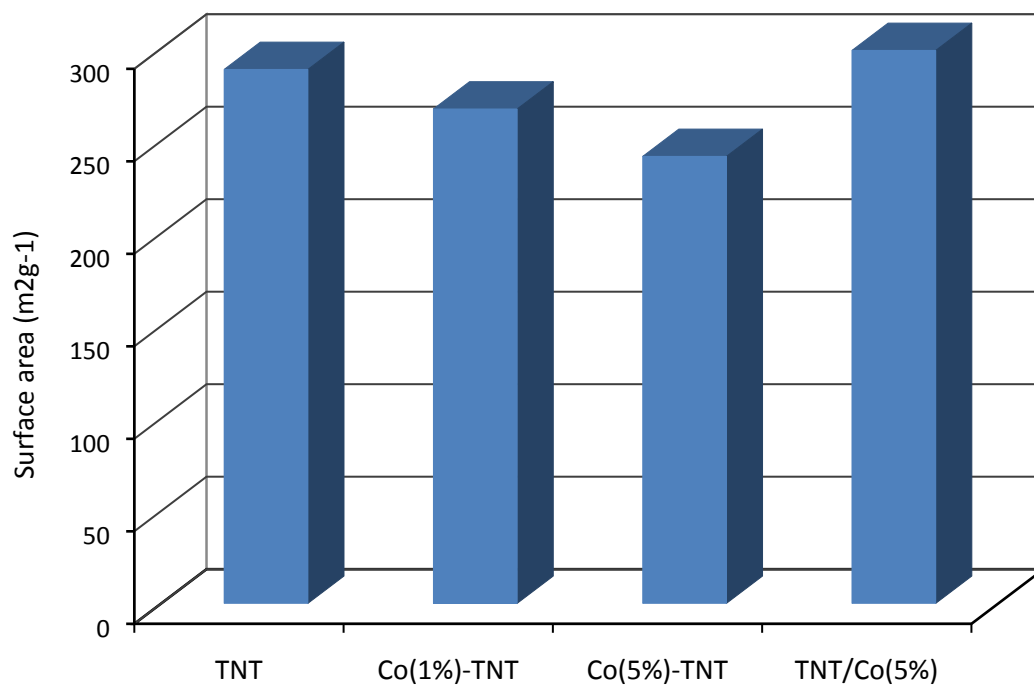

**Fig. S2** – Surface specific area for the TNT, Co(5%)-TNT, Co(1%)-TNT and TNT/Co(5%) samples

Supplement: c6cp01889k2.pdf [file c6cp01889k2.pdf]

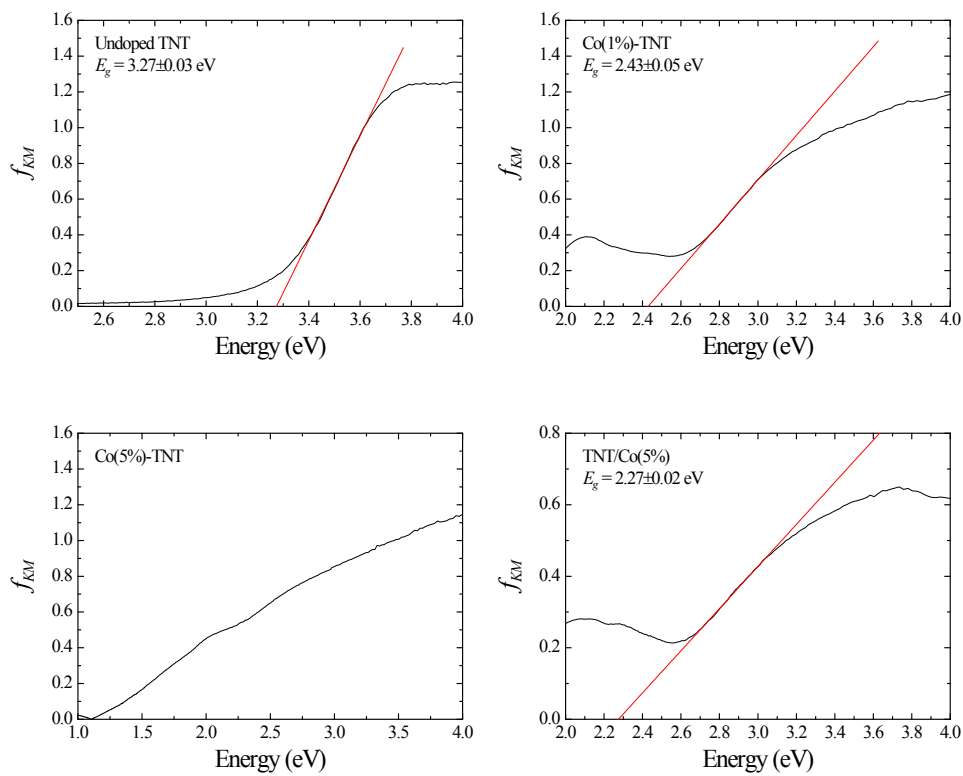

**Fig. S3** – Tauc plots for TNT, Co(1%)-TNT, Co(5%)-TNT and TNT/Co(5%) samples.

Supplement: c6cp01889k3.pdf [file c6cp01889k3.pdf]
